# Supplementary material for: Trimethyltriazacyclohexane as bridging ligand for triangular Cu3units and C–H hydride abstraction into a Cu6cluster
Source: Royal Society of Chemistry journal article supplement (doi:10.1039/b302670a), 2003-01-01
Supplement: b302670a.doc [file b302670a.doc]

Supporting Information

Trimethyltriazacyclohexane as bridging ligand for triangular Cu3 units and C-H hydride abstraction into a Cu6 cluster

Randolf D. Köhn,* Zhida Pan, Mary F. Mahon and Gabriele Kociok-Köhn

Synthesis of Complexes **A** and **B**

All manipulations were carried under standard Schlenk-line and glovebox techniques. All the solvents were completely dried, distilled under nitrogen and vacuum-transferred into the reaction flask.

0.312g [Cu(MeCN)4](BF4) (1 mmol) was weighed in a 100 ml Schlenk flask, and a solution of 0.17g trimethyltriazacyclohexane (L) (1.32 mmol) in 100ml degassed CH2Cl2 added. The whole system was kept under vacuum. The mixture was stirred for 12 hours at room temperature. Some white solid precipitated and the solution was decanted to another flask. Crystals suitable for X-ray diffraction study were obtained after slow concentration to 20ml by cooling a connected flask with liquid N2. The white solid was collected and washed with cold CH2Cl2 several times, giving a yield of 0.051g (22%). In two cases, highly air-sensitive crystals were selected for X-ray diffraction studies showing that the crystals consist (at least) of **A** and **B**.

Notes on the refinement of crystal structures **A** and **B**:

**A** co-crystallises with two solvent molecules of CH2Cl2. Due to weak data the refinement resulted in a high R-value.

**B** co-crystallises as well with two molecules of CH2Cl2. One of the solvent molecules is disordered about a mirror plane.
